# Charge and hydrophobicity are key features in sequence-trained machine learning models for predicting the biophysical properties of clinical-stage antibodies.

Max Hebditch<sup>1</sup>, Jim Warwicker<sup>1</sup>

<sup>1</sup>School of Chemistry, Manchester Institute of Biotechnology,

The University of Manchester, 131 Princess Street, Manchester, M1 7DN

max.hebditch@manchester.ac.uk, jim.warwicker@manchester.ac.uk

## ABSTRACT

Improved understanding of properties that mediate protein solubility and resistance to aggregation are important for developing biopharmaceuticals, and more generally in biotechnology and synthetic biology. Recent acquisition of large datasets for antibody biophysical properties enables the search for predictive models. In this report, machine learning methods are used to derive models for 12 biophysical properties. A physicochemical perspective is maintained in analysing the models, leading to the observation that models cluster largely according to charge (cross-interaction measurements) and hydrophobicity (self-interaction methods). These two properties also overlap in some cases, for example in a new interpretation of variation in hydrophobic interaction chromatography. Since the models are developed from differences of antibody variable loops, the next stage is to extend models to more diverse protein sets.

**Availability:** The web application for the sequence based algorithms are available on the protein-sol webserver, at <https://protein-sol.manchester.ac.uk/abpred>, with models and virtualisation software available at <https://protein-sol.manchester.ac.uk/software>.

## INTRODUCTION

The promise of therapeutic monoclonal antibodies relies on the ability of the pharmaceutical industry to develop large scale manufacturing processes that can produce safe, reproducible, and economical formulations. Identifying problematic antibody formulations, as early as possible in the drug discovery programme, has become a key area of research. To serve this interest, researchers have identified various experimental platforms, and developed theoretical tools, in an attempt to identify antibodies that may exhibit deleterious solution properties, also referred to as developability issues (Jarasch *et al.*, 2015; Kohli *et al.*, 2015). The use of experimental methods necessitate the production of a large number of candidates, which is both expensive and time consuming. There is also the cost of conducting the biophysical characterisation assays and interpreting the result. For these reasons, there has been interest in developing new techniques to minimise sample requirements, or increase throughput (Razinkov *et al.*, 2013; Man *et al.*, 2019). To help alleviate the sample requirement issues for experimental methods, several groups have developed theoretical tools to assay the solubility, or developability, before any expression or purification is required (Lauer *et al.*, 2012; Obrezanova *et al.*, 2015; Hou *et al.*, 2018; Sankar *et al.*, 2018). Although excipients and solution conditions have a large effect on biophysical solution behaviour, the properties of the formulation will be determined *de novo* by sequence and structure, and thus form the basis for many theoretical approaches. There are a number of sequences based predictors of protein aggregation, particularly as applied to amyloid proteins, in the literature (Tartaglia and Vendruscolo, 2008; Conchillo-Solé *et al.*, 2007; Walsh *et al.*, 2014), and recent work has applied these techniques for predicting the solubility of biotherapeutics (Sormanni *et al.*, 2017; Raybould *et al.*, 2019).

The use of these *in silico* candidate screening techniques accelerates the biotherapeutic development process, through the identification of high value leads and new engineering targets (Shan *et al.*, 2018), and in some cases even improving biological activity (Kumar *et al.*, 2018). However, the development of these tools is reliant on the availability of high quality experimental datasets and is thus heavily dependent on the progress of experimental techniques. Notably, the recent release of antibody biophysical characterisation datasets (Goyon *et al.*, 2017; Jain *et al.*, 2017a) has allowed the development of further theoretical tools to predict, assess and understand the

physicochemical properties that are correlated with the successful development of a therapeutic antibody, on a scale previously unattainable to academic researchers. The Jain *et al.* (2017a) report in particular is an excellent resource as it analysed 137 antibodies, representing a wide variety of late stage clinical therapeutics, across 12 different biophysical characterisation platforms. The study identified where there is overlap between complementary approaches and which platforms should be prioritised for assaying candidate therapeutic mAbs.

When available, previous work from our group has used experimental data to produce algorithms for both prediction and theoretical calculation which we have made freely and openly available as web applications on the <https://protein-sol.manchester.ac.uk> web server. Prior to the release of the high throughput biotherapeutic datasets, we have focussed on using other large datasets, such as the Niwa *et al.* (2009) *E.coli* solubility dataset, as a proxy for therapeutic proteins, to study the role of sequence information in predicting protein solubility (Hebditch *et al.*, 2017). Using the Goyon *et al.* (2017) dataset we studied the importance of CDR (complementarity-determining regions) length and aromatic content for predicting behaviour on HIC (hydrophobic interaction columns) (Hebditch *et al.*, 2018). Lastly, we have developed tools for predicting the presence of hydrophobic and charged patches as well as fold state stability (Hebditch and Warwicker, 2019) from crystal structures available in the PDB (Berman *et al.*, 2007) and applied these observations to experimental work (Austerberry *et al.*, 2017). After the release of the Jain *et al.* (2017a) dataset, reports have appeared in the literature using the dataset. For example, predictive models of HIC performance using QSPR models (Jetha *et al.*, 2018) and a combined sequence and structure approach (Jain *et al.*, 2017b). CDR properties of the Jain *et al.* (2017a) dataset have also been implicated in identifying antibodies with developmental issues (Raybould *et al.*, 2019), and the dataset has also been used to benchmark aggregation prediction algorithms (Sankar *et al.*, 2018).

In this report, we describe our approach to using machine learning algorithms trained on the Jain *et al.* (2017a) dataset. Models for all 12 biophysical measurement platforms are produced, with varying efficacies. Compared to other approaches, our models rely simply on sequence information which is readily available in comparison to structural approaches. The models are interrogated for which sequence features contribute most significantly for each measurement. Clustering of models using according to sequence features is largely in accord with that from

experiment. We associate charge and hydrophobicity as the features of most importance. In a novel interpretation of results for HIC, a complexity is revealed whereby charge effects are hypothesised to be minor at low retention times, but major at high retention times, owing to the ionic strength gradient that is used to modulate hydrophobicity.

## MATERIALS AND METHODS

### Dataset

The Fv (concatenated VH and VL) sequences for the 137 antibodies (mAb137), as well as the experimental result data for the 12 biophysical platforms were obtained from Jain *et al.* (2017a). The experimental methods were: AC-SINS (affinity-capture self-interaction nanoparticle spectroscopy), CSI-BLI (clone self-interaction by bio-layer interferometry), PSR (poly-specificity reagent), BVP-ELISA (baculovirus particle ELISA), CIC (cross-interaction chromatography), ELISA (enzyme-linked immunosorbent assay), HEK (HEK cell expression titer), HIC (hydrophobic interaction chromatography), SGAC-SINS (salt-gradient affinity-capture self-interaction nano-particle spectroscopy), SMAC (stand-up monolayer adsorption chromatography), SEC (size-exclusion chromatography), DSF (differential scanning fluorescence).

### Identifying explanatory variables

Following on from previous work where we used protein sequence features to estimate solution behaviour (Hebditch *et al.*, 2017), we have used the same 35 sequence features in an attempt to understand the variance in the 137 antibodies with the 12 different biophysical characterisation assays. The 35 features are composed of the standard 20 amino acid propensities, followed by 7 amino acid composite scores ( $KmR = K-R$ ,  $DmE = D-E$ ,  $KpR = K+R$ ,  $DpE = D+E$ ,  $PmN = K+R-D-E$ ,  $PpN = K+R+D+E$ ,  $aro = F+W+Y$ ) and a further 7 sequence features ( $fld =$  folding propensity (Uversky *et al.*, 2000),  $dis =$  disorder propensity (Linding *et al.*, 2003),  $bet =$  beta strand propensities (Costantini *et al.*, 2006),  $mem =$  Kyte-Doolittle hydrophathy (Kyte and Doolittle, 1982),  $pI$ , absolute charge and sequence entropy (Hebditch *et al.*, 2017)). The complementary determining regions (CDRs) were identified for each Fv sequence using a set of sequence based rules (Abhinandan and Martin, 2008).

## Feature engineering and preprocessing the experimental datasets

For each experimental method, we first determined which features should be selected as explanatory variables. If we desired to simply maximise the  $R^2$  value, we could retain all of the variables as the  $R^2$  value will always increase with higher degrees of freedom (Kvålseth, 1985). However in order to generate the most robust, and interpretable, model it is preferable to reduce the number of variables used. For example, collinearity occurs in multivariate linear regressions when input/explanatory variables are correlated, and this correlation can destabilise the estimation of individual coefficients (Farrar and Glauber, 1967). If the VIF value is high, the variance of the coefficient in the multivariate model is high, and thus the estimation of the standard error is high. To account for this, for each experimental platform we selectively removed variables with a high VIF score (traditionally considered 10 and above) to address the issue of multicollinearity (O'Brien, 2007). This list of non-collinear variables formed our first set of explanatory variables: *VIF all*. To identify the most important coefficients we conducted a mixed stepwise selection regression (Venables and Ripley, 2013) to minimise the Akaike information criterion (Akaike, 1998). This process resulted in the second of our two sets of explanatory variables for each biophysical platform: *VIF selected*. For each experimental dataset, we then scaled the explanatory variables to ensure that the coefficient value of each explanatory variable would be comparable, as well as for aiding the prediction of the statistical techniques.

## Mathematical transformation of the experimental data

Many machine learning algorithms perform best on normally distributed datasets (James *et al.*, 2013), and it is common practise to mathematically transform non-normal distributions in order to improve the predictive power of machine learning approaches. We noted that many of the values are in fact better described by a generalized extreme value distribution type 1 (Gumbel distribution). As many of the experimental distributions appeared to be significantly non-normal, we normalised all of the distributions using a mathematical transformation (see Table 1). For each dataset, we attempted to normalise the distribution of experimental values using the R package *bestNormalize* and then trained the algorithm against both the standard and normalised datasets using both the stepwise selected and complete sets of coefficients (Peterson, 2017). For the datasets with significantly non-normal distributions, the machine learning algorithm was then trained on

these transformed experimental values and will thus produce regressions in the context of the transformed space. Although these transformed predictions do not have any physical meaning, they are still mathematically related to the original experimental value, and can therefore be used to compare between proteins in the mAb137 dataset.

## Statistical model selection and cross-validation

We tested the performance of both parametric and non-parametric machine learning algorithms. The advantage of non-parametric methods is that they are generally unbiased as they do not expect the data to fit to an *a priori* approximation. This flexibility however comes at the cost of generally requiring larger datasets in order to model the relationship, and the increased degrees of freedom can lead to overfitting the data. Parametric algorithms are easier to interpret and are more useful for inferential statistical approaches, but are however more likely to be biased as they assume a structure to the data that may not exist (James *et al.*, 2013). To determine which algorithm should be used for each experimental method, we tested 11 different regression algorithms representing a selection of parametric and non-parametric algorithms. Each algorithm was provided with both sets of explanatory variables (*VIF all* and *VIF selected*) and the normalised and standard datasets for each of the 12 experimental methods.

For predicting how machine learning models perform on unseen data a validation approach is required. Traditionally a hold-out, or lock box, validation approach is favoured, however for a dataset of this size ( $n = 137$ ), a hold out-approach for estimating model performance would be problematic. Firstly it would be difficult to ensure that both the validation and hold-out would be truly representative of the sample, for this reason, any partition of the data would be highly variable due to randomness in selecting the hold-out set. Secondly, machine learning approaches perform worse with fewer observations, and by necessity a hold-out validation approach will immediately remove a substantial portion of the data for validation. For these reasons, we chose to use cross-validation for estimating the test error directly from the training data, a technique common in life sciences (Krstajic *et al.*, 2014). A traditional approach to cross-validation is the k-fold technique where the data is divided into k folds, with 1 of the folds being put aside for validating a model trained on the remaining k-1 folds. Compared to the hold-out validation method, this ensures that we can use the entirety of our data for training the algorithms whilst

still retaining an estimate of performance on future data. Other cross-validation approaches to studying the mAb137 dataset (Jetha *et al.*, 2018) have used leave-one-out cross-validation, which is a special subset of k-fold cross-validation where the number of folds is equal to the number of observations, and thus each validation fold consists of a single observation with the remaining folds used to train the algorithm. The leave-one-out form of cross-validation will tend to have higher variance than a k-fold of 10 approach due to the high similarity of the training sets, which only differ by 1 sample (Kohavi, 1995). This means that each dataset in the leave-one-out approach is highly correlated, whereas if a smaller number of k-folds are used, the training sets are more diverse and should therefore provide a more accurate estimate of the test error as a proxy for performance on unseen data due to the bias-variance trade-off (James *et al.*, 2013). As we are most concerned with providing a robust predictive algorithm which can be applied to future unseen data, we chose to use a 50 times repeated 10-fold cross validation approach as a trade-off between providing the model with as much training data as possible, whilst maintaining a robust and diverse training set to avoid over fitting (Braga-Neto and Dougherty, 2004; Krstajic *et al.*, 2014). As part of the cross-validation process we used a grid search value of 5 for parameter tuning to determine the optimal model instance. For the HIC dataset, we excluded the experimental values with a value of 25, as these were arbitrarily assigned a value of 25 due to exceeding the maximum measurement time and were thus misleading for the training. Both the algorithms and cross-validation were implemented using the caret (Kuhn, 2008) package in R version 3.5.1.

## Selection of machine learning algorithms and data input

After training each algorithm on the original untransformed and transformed experimental data, the algorithms with the lowest MAE were chosen for further exploration. For most of the experimental datasets, the best performing algorithms were the elastic net, a linear algorithm (Zou and Hastie, 2005), using the stepwise selected variables, and the non-linear algorithms: support vector machines (SVM) (Drucker *et al.*, 1997), and random forest (Ho, 1995), both using the complete set of non-collinear variables (see Table 1). The selected model for each experimental method was then used to predict the entire experimental dataset to obtain predicted values for each of the proteins.

## Meta score

We also provide a meta score which combines and averages multiple biophysical platforms. The meta score is calculated by ranking the original Jain dataset in order from best to worst result, and then calculating where the candidate sequence falls within that ranking for each biophysical platform. We rescale the rankings from 1–100, with 1 being predicted to be the best, and 100 predicted to be the worst, with the rankings ordered dependent on whether higher or lower better values are preferable. We then combine and average the ranks for the biophysical platform. For META X we average the rankings for ELISA, BVP, PSR, CSI, ACC STAB and CIC, and for META Y we average SMAC and HIC. The lower the ranking the better for each group, and thus the closer to origin (0,0) the better we predict the candidate to behave on average across the platforms.

## Web application and model availability

Previous work from our group has focussed on developing predictive models (Hebditch *et al.*, 2017) and theoretical tools (Hebditch and Warwicker, 2019) which we have made freely available as a suite of web-tools for the wider research community at <https://protein-sol.manchester.ac.uk>. Accordingly, we have made all twelve machine learning algorithms available at protein-sol. The user can enter a candidate Fv sequence into the web application, which is then processed using the same methodology as described in this study. The sequence composition scores of the new sequence are preprocessed for scale, and where applicable mathematical transformations applied (Table 1). The composition variables are then used as new inputs for the trained algorithms to obtain predictions for the 12 biophysical experiments. The web application provides an interactive scatter plot, with the original, or transformed, experimental value on the x-axis, and the predicted value from the machine learning algorithm for the same protein on the y-axis (Figure 1). As the new candidate sequence has only a predicted value, we assign  $x = y$ . The web application presents the 12 predicted experimental values and the calculated META value in the context of the original mAb137 dataset to allow the user to assess the prediction. Hovering over the individual points on the scatter graph provides the name and FDA approval stage of the protein in question, as well as the original experimental value and the predicted value from the machine learning algorithm for comparison to the candidate protein. Where the machine learning algorithm has been trained on a mathematically transformed dataset (see Section ) it is important to note that the



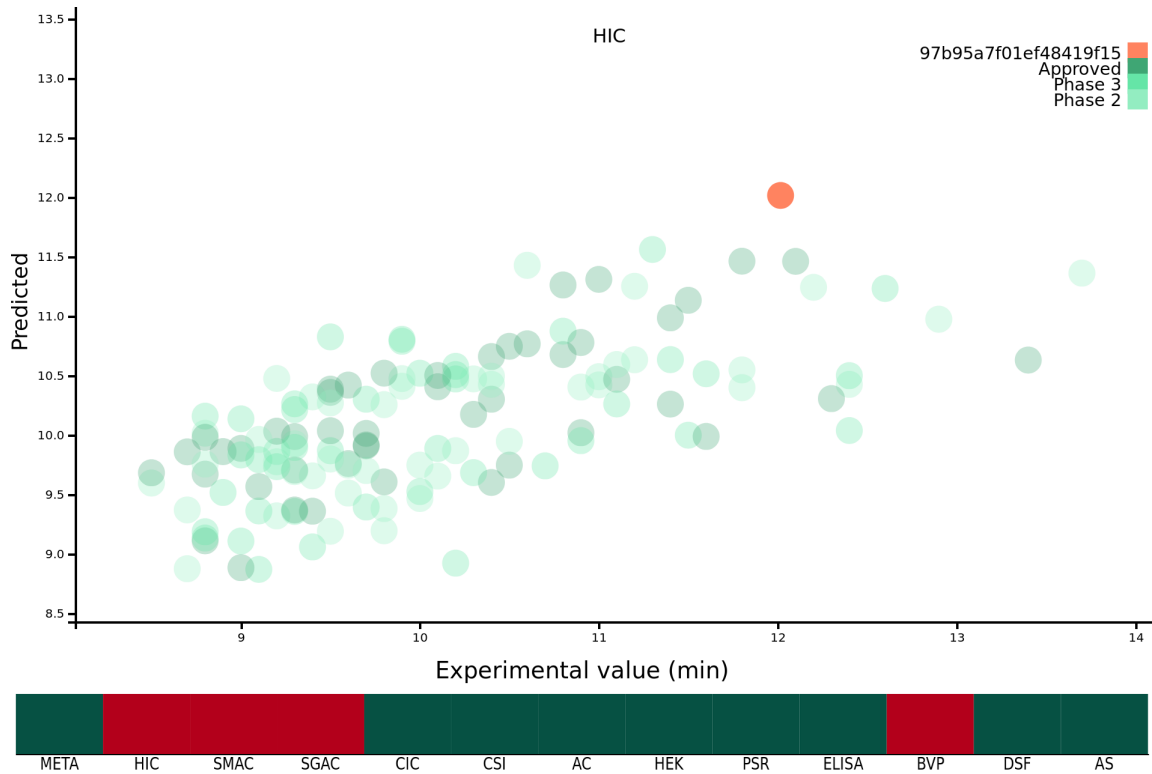

|                       | HIC                 | SMAC                | CIC              | ACSINS              | ELISA          | BVP            | SGAC-SINS      | PSR            | HEK            | DSF            | CSI              | ACC-STAB       |
|-----------------------|---------------------|---------------------|------------------|---------------------|----------------|----------------|----------------|----------------|----------------|----------------|------------------|----------------|
| <b>Algorithm</b>      | Elastic net         | Elastic net         | SVM              | Elastic net         | Random forest  | Random forest  | SVM            | SVM            | SVM            | SVM            | SVM              | SVM            |
| <b>Variables</b>      | <i>VIF selected</i> | <i>VIF selected</i> | <i>VIF all</i>   | <i>VIF selected</i> | <i>VIF all</i> | <i>VIF all</i> | <i>VIF all</i> | <i>VIF all</i> | <i>VIF all</i> | <i>VIF all</i> | <i>VIF all</i>   | <i>VIF all</i> |
| <b>Transformation</b> | None                | Ordered quantile    | Ordered quantile | Ordered quantile    | None           | None           | None           | None           | None           | None           | Ordered quantile | None           |
| <b>r<sup>2</sup></b>  | 0.391               | 0.353               | 0.306            | 0.268               | 0.383          | 0.355          | 0.215          | 0.316          | 0.1121         | 0.13           | 0.169            | 0.086          |

Table 1: Chosen machine learning algorithm summary. For each experimental dataset we tested a number of different algorithm, variable and mathematical transformation types.

values on the  $x$  and  $y$  axis are reported on the same transformed scale. For the candidate sequence the user is also given a ranking, scaled from 1 – 100 where 1 is always the preferential ranking, for each experiment, allowing the user to contextualise how the candidate sequence performs in comparison to the mAb137 set of clinical stage therapeutics. The heat map is colour coded for each Fv dependent on the threshold value. We use threshold values, available for 10/12 experimental platforms, from the original Jain *et al.* (2017a) study, for the remaining 2/12 (HEK and DSF) we set the threshold to mark values that rank within the worst 10% of the experimental values. If the predicted value is above the threshold value for the experiment, the corresponding square is coloured red, otherwise it is coloured green. Hovering over the heat map changes the displayed scatter graph to display the predictions for that category, as well as the ranking of the candidate sequence for that experiment.

The web application allows users to easily visualise and understand the predictions for single Fv sequences. If the user wishes to make predictions for multiple proteins, or implement the abpred software into their own pipelines, we are also providing the complete suite of software both as a repository with instructions for installing dependencies, and also as a docker image which is an industry standard form of operating system virtualisation allowing the user to download a preconfigured image containing all of the required software designed to run cross platform on Linux, Windows and macOS. These resources are available at <https://protein-sol.manchester.ac.uk/software>.

## RESULTS AND DISCUSSION

### Models for 12 biophysical properties that characterise antibody behaviour

Using the sequence information for the 137 Fv (concatenated VH and VL) from the Jain *et al.* (2017a) dataset (mAb137) we trained multiple different machine learning algorithms, on the

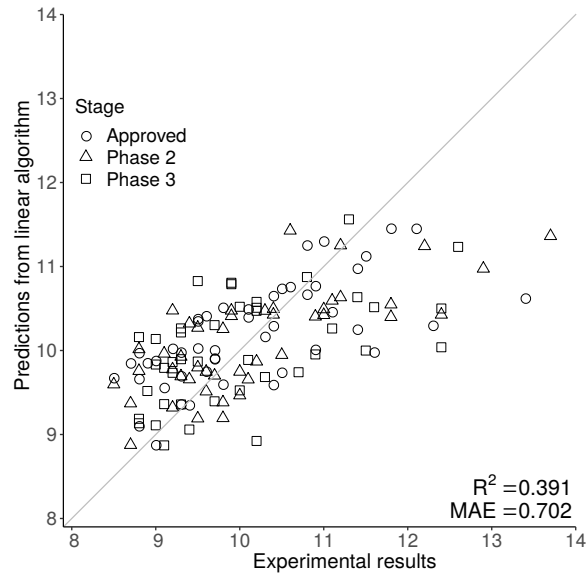

Figure 2: The scatter graphs demonstrate the predictive power of the HIC model, where the original experimental value is on the  $x$  axis, and the prediction is on the  $y$  axis. The closer each data point is to the  $y = x$  line the better the prediction. Predictions for HIC are generally close to the  $y = x$  line at lower, but not at higher retention times.

original, and mathematically transformed datasets. To ascertain generalisability, each algorithm was trained using 50-repeat 10-fold validation. From the cross-validation we obtained the mean average error (MAE) value which was used to choose determine which combination of algorithm and experimental data transformation best described each of the 12 experimental datasets (see methods). Finally, we then used the cross validated models to describe the entirety of the experimental data in order to obtain predicted values corresponding to each experimental value to power the prediction matrix (Figures 2, S1, and S2). Using MAE as a qualification metric for model quality, we demonstrate that machine learning models trained simply on Fv sequence information, can provide accurate predictions, although accuracy varies substantially over the measured 12 properties (Table 1). Figure 2 shows one of the better performing models (HIC) with good agreement at lower at lower HIC values but less effective prediction at higher HIC values. The feature selection stage of the machine learning methods gives an indication of the sequence-based features that are most associated with particular biophysical properties. A complementary approach, is to examine correlations between sequence features and measured properties.

For each experimental dataset, we calculated the Pearson correlation coefficient between each calculated sequence feature and the experimental value for the entire Fv chain (Figure 3).

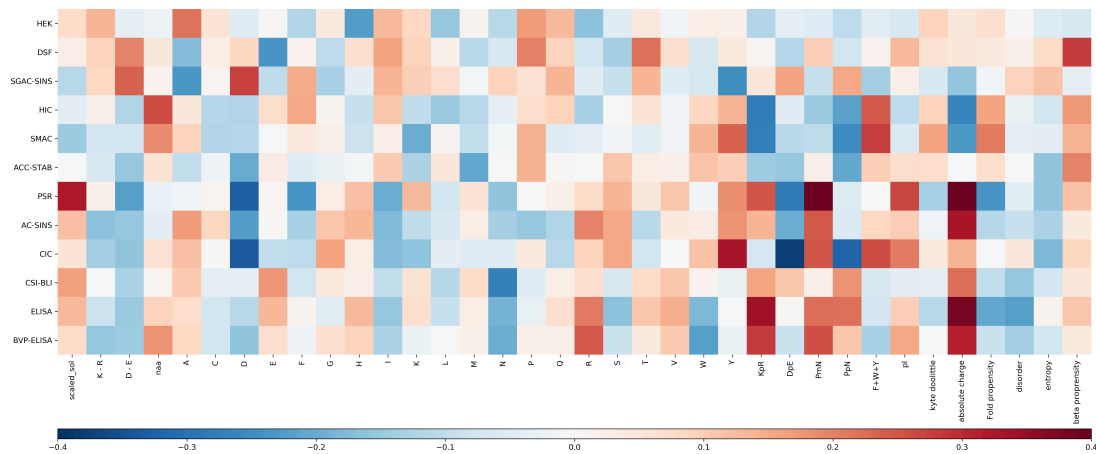

Figure 3: Heat map of the correlation between the Fv sequence composition scores used in the abridged algorithms and the score on each of the experimental datasets for the mAb137 dataset. Dark red values indicate a stronger positive correlation, and dark blue values indicate a stronger negative correlation.

Inspection reveals that some biophysical measurements are associated with sets of sequence correlations that are of larger magnitude than for other measurements. These largely reflect our observations for models developed with machine learning. Generally, the models shown in Figure S1, with greater overall correlation values, and giving predictions that lie close to the  $y = x$  diagonal, are associated with greater correlation magnitudes reading across in Figure 3. Consideration of sequence features that underlie models is important in further our understanding of molecular behaviour, as demonstrated with presentation of a new model for mAb behaviour in HIC, in a subsequent section.

### Clustering of biophysical characterisations

Hierarchical clustering of biophysical characterisation for the 137 mAbs revealed 5 clusters (Jain *et al.*, 2017a), which we are able to now associate with enrichment for higher correlations with certain sequence features. A grouping of positive correlations for charge-associated properties is apparent (Figure 3) for the largest cluster identified previously (PSR, CSI, ACSINS, CIC), but we would add in a second of the original clusters (ELISA, BVP) that sits next to the largest cluster in the hierarchical tree. These 6 properties lie at the bottom of the heat maps in Figure 3 and (to varying degrees) give correlations for absolute charge and negative charge subtracted from positive charge (PmN) *i.e.* overall net positive charge. The 6 assays in this cluster assess

cross-interaction (BVP, ELISA, CIC, PSR) and self-interaction (CSI, ACSINS). We predict that, for the cross-interactions, negatively-charged proteins (or regions of proteins) are being targeted by more positively-charged CDRs in the mAbs. For self-interactions, absolute charge favours interaction, but it is less clear that this is a positive charge.

Whereas SMAC, HIC and SGAC-SINS were clustered according to biophysical characterisation (Jain *et al.*, 2017a), Figure 3 indicates (according to sequence properties) that SMAC and HIC are more closely related to each other than to SGAC-SINS, including positive correlation of aromatic content with association to the hydrophobic medium. This observation is consistent with our earlier modelling (Hebditch and Warwicker, 2019) for HIC measurements with a smaller dataset (Goyon *et al.*, 2017), given the multiple dependencies of biophysical properties on sequence features it is unsurprising that models constructed with machine learning methods give correlations that are useful, but far from precise. It is likely that consideration of 3D structure can improve modelling when we have sufficient understanding of properties such as a shape-dependence of the hydrophobic effect (Hebditch and Warwicker, 2019), but 3D structure will not always be available and models are liable to error. In this context we have used the clustering of biophysical characterisation methods, which largely agrees when clustering is based either on the measurements themselves (Jain *et al.*, 2017a), to generate two combinations for prediction. Further, we loosely associate these two predictors with variation within a dataset of two overriding features. For cross-interaction and self-interaction, BVP, ELISA, CIC, PSR, CSI and ACSINS predicted rankings are averaged and displayed along the horizontal axis, and for hydrophobic interaction the rankings from HIC and SMAC are averaged and displayed on the vertical axis. The background to the plot, labelled 'meta' prediction, are the combined rankings calculated for the 137 mAb set. There is some cross-over between these two combinations, for example the charge effects in HIC (Figure 3), and a positive correlation between CIC data and aromatic content, which is accommodated in the models for individual biophysical properties. In general terms though, this 'meta' prediction can be thought of as displaying variation associated with charge-related properties (horizontally), and variation associated with hydrophobicity (vertically).

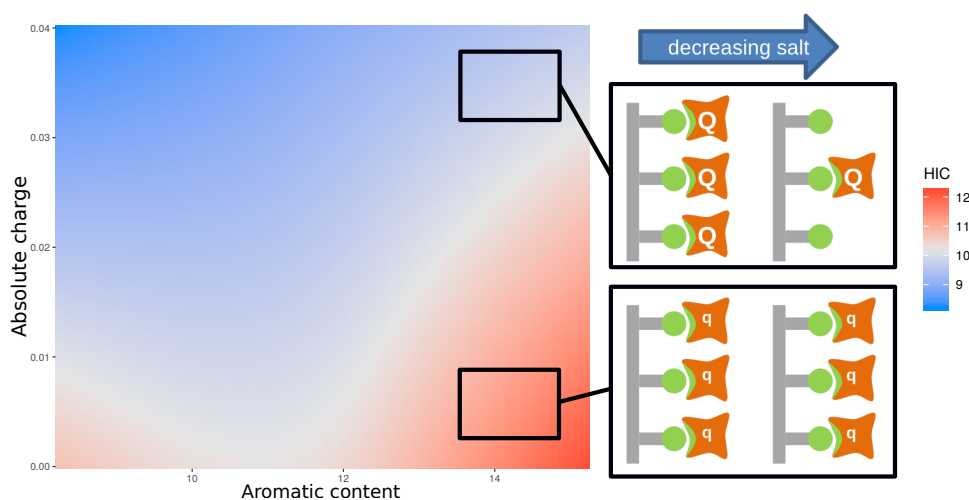

Figure 4: Plot of an interaction model trained on the aromatic content and absolute charge for the mAb137 dataset and HIC experimental data. Red indicates areas of higher HIC retention time, and blue areas of lower retention time. The schematic provides a suggested physical explanation for differences in HIC values in sequences with high aromatic content denoted by green non-polar interactions.

## HIC and the interplay between charge and hydrophobicity

For HIC we note that (Figure 3) strong correlations between HIC value and aromatic content (positive) and absolute charge (negative). From Figure S3, it is clear that there is no simple delineation between the high and low charge sequences (Figure S3a) when considering the relationship between aromatic content and HIC, and between the high and low aromatic content sequences when considering the relationship between absolute charge and HIC (Figure S3b). This suggests that the relationship between HIC and charge/hydrophobicity is not linear, and will thus not be captured by traditional linear models. To account for this, we calculated an interaction model between aromatic content and absolute charge for predicting HIC retention time (Figure 4). Tracking the plot across at constant charge, about one third up along the charge axis, the expected behaviour is evident, where aromatic content is used to represent hydrophobicity. More generally though the plot shows that increased charge leads to lower retention times in HIC, for a uniform content of aromatic residues, evidenced by a worsening of the correlation between measurement and prediction at higher HIC values (Figure 2). Deconvoluting and keeping track of features that are included in a model permits physical interpretation and re-evaluation that may be valuable for research into HIC methodology.

Figure 4 also includes a physical interpretation of these data. At higher ionic strength (relating to lower retention times in HIC), charge interactions between bound proteins are screened and thus high net charge proteins (Q) behave in a similar manner to those with low net charge (q). At lower ionic strength (and longer elution times), charge interactions are no longer screened as effectively, so that repulsion between proteins with higher net charge (Q) would lead to greater elution of these proteins relative to those with smaller net charge (q). This combination of experimental data, informatics, and physicochemical analysis, leads to a novel interpretation of the complexity required in accounting for HIC data.

### Applicability of models to other systems

Our models have been developed with specific biophysical characterisations and a single type of protein therapeutic, giving rise to the question of whether they retain predictive ability when either of these factors are changed. We have focussed on characterisation by HIC, largely since careful comparison of the data yields the insight that ionic strength variation during elution leads to a dependence on charge as well as hydrophobicity. Of the reported biophysical methods (Jain *et al.*, 2017a), HIC is widely used, however it is applied in variants of the format that lead to altered ranges of measured retention times. A set of 97 mAb variants, targeting integrin  $\alpha 11$ , have HIC elution times in the range of 20–30 minutes, compared with those used for the current models that are centred around 10 minutes (Jetha *et al.*, 2018). Models can still be assessed with correlation, or relative ranking, even when the measurement domains are different. A scatter plot of HIC values calculated with our model against experimental values has a similar appearance to a that produced with a sequence-based prediction developed in the original study (not shown) (Jetha *et al.*, 2018). The correlation coefficient for the scatter plot in our calculation is 0.35, lower than reported by Jetha *et al.* (2018) (0.46), but significant ( $p = 0.00044$ , 97 data points). The mAb variants in this study consist of mutations designed to reduce hydrophobicity, with varying degrees of success in the design, which are largely reflected in the scatter plot for model versus experimental HIC. Interestingly, a group of mutations based on Y30 are amongst the more poorly predicted set, and this residue is part of a relatively small hydrophobic patch and likely not involved in binding to integrin  $\alpha 11$ . In contrast the sequence space of the 137 mAb set will be determined mostly by altered binding to the various targets, and therefore qualitatively different to the 97

mAb set. Jetha *et al.* (2018) observe that structure-based modelling can be used to distinguish surface environments, consistent with our own report that an improved understanding of the shape-dependence of the hydrophobic effect is needed (Hebditch and Warwicker, 2019).

With regard to measurements for non-mAb systems, we follow Jetha *et al.* (2018) in comparing predicted HIC values with measured inclusion body (IB) percentage formation for 31 adnectin loop variants (Trainor *et al.*, 2016), *i.e.* assuming that hydrophobicity is a contributing factor in IB formation. Our model for HIC correlates with the IB percentage data, yielding  $R = 0.668$  ( $p = 0.00004$ , 31 data points).

These tests, against other mAbs and another loop-based protein affinity system, give us confidence that the models can be used for relative ranking of candidate molecules. There are clearly insufficiencies in the models, and correlations vary across models. Developments may come from inclusion of 3-dimensional structure (where available). Careful analysis of models can yield areas where improved physicochemical understanding is possible, illustrated here with HIC data.

## CONCLUSION

A set of predictive models are presented for the 12 biophysical properties assessed in a landmark study of 137 mAbs (Jain *et al.*, 2017a). The models have been developed from sequences of the (heavy and light chain) variable domains, using the 20 amino acid compositions and 15 sequence-derived features that represent physicochemical properties (Hebditch *et al.*, 2017), and variation in those properties between the CDRs of the 137 mAbs. Machine learning methods have been used to access fits to the data that would be missed by linear models. In the event it turns out that linear models can account for much of the variation observed, whilst for some of the measured properties it is difficult to obtain an effective predictive model. These deficits, for example in DSF ( $T_m$ ) and HEK (expression titer) may highlight where sequence fails to capture salient structural features (Jetha *et al.*, 2018; Raybould *et al.*, 2019), or important factors in the solution environment. Sequence-based prediction, though, is accessible to users without structural information, it negates the requirement for comparative modelling (with its potential errors), and in prior work we find that 3D-based methods are still in development in regard to assessment of hydrophobic interactions at CDRs (Hebditch *et al.*, 2018). An advantage of our methodology,



with models for 12 biophysical properties, is that models can be clustered and examined in the context of common sets of sequence features with higher correlations. This clustering is similar to that established in the original report of the mAb137 set data. Further, the method allows new interpretation of underlying physicochemical behaviour. The example given is for HIC, where despite delivering one of the better models, we find that charge combines with hydrophobicity in a way that is difficult to capture precisely. However, the fundamental nature of this combination can plausibly be related to the HIC method. An ammonium sulphate gradient (high to low) is used to modulate hydrophobicity. We hypothesise that at shorter elution times, charge plays less of a role (with electrostatic interactions screened) but is more important at longer elution times, at lower ionic strength and with proteins with higher net charge repelling each other on the support. The current work complements other modelling studies, but of individual properties, built on the mAb137 set (HIC, Jain *et al.* (2017a); CIC, Kizhedath *et al.* (2019)). It also adds to studies prior to reporting of the mAb137 set, that identified QSAR as an effective area for prediction of mAb solution properties (Sharma *et al.*, 2014; Robinson *et al.*, 2017).

A key question for prediction methods developed with data for mAbs, is how well they transfer to other proteins, particularly since the emphasis is on differences in CDRs. Since the detail of experimental procedures is likely to vary, the first step to other systems is to swap from a comparison of absolute values to rankings or correlations, using the numerical values given in our method. Following this procedure, our HIC prediction model is effective for another set of mAbs (Jetha *et al.*, 2018) and a set of adnectin variants (Trainor *et al.*, 2016). Both of these additional sets are centred on variation in defined loop regions. In the next stages of the work, wider variation in proteins will be studied, requiring collaboration with experimental determination to both extend the range of measurements, and to narrow the range of biophysical techniques to focus studies.

## ACKNOWLEDGEMENTS

The authors would like to acknowledge feedback from members of the Warwicker and Curtis groups at the University of Manchester.

## FUNDING

This work was supported by the UK EPSRC (grant EP/N024796/1).

## REFERENCES

- Abhinandan, K. R. and Martin, A. C. R. (2008). Analysis and improvements to kabat and structurally correct numbering of antibody variable domains. *Molecular immunology*, **45**, 3832–3839.
- Akaike, H. (1998). Information theory as an extension of the maximum likelihood principle. In *Selected papers of Hirotugu Akaike*, pages 199–213. Springer.
- Austerberry, J. I., Dajani, R., Panova, S., Roberts, D., Golovanov, A. P., Pluen, A., van der Walle, C. F., Uddin, S., Warwicker, J., Derrick, J. P., *et al.* (2017). The effect of charge mutations on the stability and aggregation of a human single chain fv fragment. *European Journal of Pharmaceutics and Biopharmaceutics*, **115**, 18–30.
- Berman, H., Henrick, K., Nakamura, H., and Markley, J. L. (2007). The worldwide Protein Data Bank (wwPDB ): ensuring a single, uniform archive of PDB data. *Nucleic Acids Research*, **35**, D301–D303.
- Braga-Neto, U. M. and Dougherty, E. R. (2004). Is cross-validation valid for small-sample microarray classification? *Bioinformatics*, **20**(3), 374–380.
- Conchillo-Solé, O., de Groot, N. S., Avilés, F. X., Vendrell, J., Daura, X., and Ventura, S. (2007). Aggrescan: a server for the prediction and evaluation of " hot spots " of aggregation in polypeptides. *BMC bioinformatics*, **8**(1), 65.
- Costantini, S., Colonna, G., and Facchiano, A. M. (2006). Amino acid propensities for secondary structures are influenced by the protein structural class. *Biochemical And Biophysical Research Communications*, **342**(2), 441–451.
- Drucker, H., Burges, C. J. C., Kaufman, L., Smola, A. J., and Vapnik, V. (1997). Support vector regression machines. In M. C. Mozer, M. I. Jordan, and T. Petsche, editors, *Advances in Neural Information Processing Systems 9*, pages 155–161. MIT Press.
- Farrar, D. E. and Glauber, R. R. (1967). Multicollinearity in regression analysis: the problem revisited. *The Review of Economic and Statistics*, pages 92–107.

- Goyon, A., D'Atri, V., Colas, O., Fekete, S., Beck, A., and Guillarme, D. (2017). Characterization of 30 therapeutic antibodies and related products by size exclusion chromatography: Feasibility assessment for future mass spectrometry hyphenation. *Journal of Chromatography B*, **1065**, 35–43.
- Hebditch, M. and Warwicker, J. (2019). Web-based display of protein surface and ph-dependent properties for assessing the developability of biotherapeutics. *Scientific reports*, **9**(1), 1969.
- Hebditch, M., Carballo-Amador, M., Charonis, S., Curtis, R., and Warwicker, J. (2017). Protein-Sol: A web tool for predicting protein solubility from sequence. *Bioinformatics*.
- Hebditch, M., Roche, A., Curtis, R. A., and Warwicker, J. (2018). Models for antibody behavior in hydrophobic interaction chromatography and in self-association. *Journal of pharmaceutical sciences*.
- Ho, T. K. (1995). Random decision forests. In *Proceedings of 3rd international conference on document analysis and recognition*, volume 1, pages 278–282. IEEE.
- Hou, Q., Bourgeas, R., Pucci, F., and Rooman, M. (2018). Computational analysis of the amino acid interactions that promote or decrease protein solubility. *Scientific reports*, **8**(1), 14661.
- Jain, T., Sun, T., Durand, S., Hall, A., Houston, N. R., Nett, J. H., Sharkey, B., Bobrowicz, B., Caffry, I., Yu, Y., Cao, Y., Lynaugh, H., Brown, M., Baruah, H., Gray, L. T., Krauland, E. M., Xu, Y., Vásquez, M., and Wittrup, K. D. (2017a). Biophysical properties of the clinical-stage antibody landscape. *Proceedings Of The National Academy Of Sciences*, **114**(5), 944–949.
- Jain, T., Boland, T., Lilov, A., Burnina, I., Brown, M., Xu, Y., and Vásquez, M. (2017b). Prediction of delayed retention of antibodies in hydrophobic interaction chromatography from sequence using machine learning. *Bioinformatics*, **33**(23), 3758–3766.
- James, G., Witten, D., Hastie, T., and Tibshirani, R. (2013). *An introduction to statistical learning*, volume 112. Springer.
- Jarasch, A., Koll, H., Regula, J. T., Bader, M., Papadimitriou, A., and Kettenberger, H. (2015). Developability assessment during the selection of novel therapeutic antibodies. *Journal of pharmaceutical sciences*, **104**(6), 1885–1898.
- Jetha, A., Thorsteinson, N., Jmeian, Y., Jeganathan, A., Giblin, P., and Fransson, J. (2018). Homology modeling and structure-based design improve hydrophobic interaction chromatography behavior of integrin binding antibodies. *mAbs*, **10**(6), 890–900.

- Kizhedath, A., Karlberg, M., and Glassey, J. (2019). Cross interaction chromatography based qsar model for early stage screening to facilitate enhanced developability of monoclonal antibody therapeutics. *Biotechnology journal*, page e201800696. Jain Newcastle QSAR.
- Kohavi, R. (1995). A study of cross-validation and bootstrap for accuracy estimation and model selection. In *Proceedings of the 14th international joint conference on Artificial intelligence*, volume 14, pages 1137–1145.
- Kohli, N., Jain, N., Geddie, M. L., Razlog, M., Xu, L., and Lugovskoy, A. A. (2015). A novel screening method to assess developability of antibody-like molecules. *mAbs*, 7(4), 752–758.
- Krstajic, D., Buturovic, L. J., Leahy, D. E., and Thomas, S. (2014). Cross-validation pitfalls when selecting and assessing regression and classification models. *Journal of cheminformatics*, 6(1), 10.
- Kuhn, M. (2008). Building predictive models in r using the caret package. *Journal of Statistical Software*, 28(5), 1–26.
- Kumar, S., Roffi, K., Tomar, D. S., Cirelli, D., Luksha, N., Meyer, D., Mitchell, J., Allen, M. J., and Li, L. (2018). Rational optimization of a monoclonal antibody for simultaneous improvements in its solution properties and biological activity. *Protein Engineering, Design and Selection*.
- Kvålseth, T. O. (1985). Cautionary note about  $R^2$ . *The American Statistician*, 39(4), 279–285.
- Kyte, J. and Doolittle, R. F. (1982). A simple method for displaying the hydropathic character of a protein. *Journal Of Molecular Biology*, 157(1), 105–132.
- Lauer, T. M., Agrawal, N. J., Chennamsetty, N., Egodage, K., Helk, B., and Trout, B. L. (2012). Developability index: a rapid in silico tool for the screening of antibody aggregation propensity. *Journal of pharmaceutical sciences*, 101(1), 102–115.
- Linding, R., Russell, R. B., Neduva, V., and Gibson, T. J. (2003). Globplot: Exploring protein sequences for globularity and disorder. *Nucleic Acids Research*, 31(13), 3701–3708.
- Man, A., Luo, H., Levitskaya, S. V., Macapagal, N., and Newell, K. J. (2019). Optimization of a platform process operating space for a monoclonal antibody susceptible to reversible and irreversible aggregation using a solution stability screening approach. *Journal of Chromatography A*.
- Niwa, T., Ying, B.-W., Saito, K., Jin, W., Takada, S., Ueda, T., and Taguchi, H. (2009). Bimodal protein solubility distribution revealed by an aggregation analysis of the entire ensemble of Escherichia coli proteins. *Proceedings Of The National Academy Of Sciences*, 106, 4201–4206.

- Obrezanova, O., Arnell, A., de la Cuesta, R. G., Berthelot, M. E., Gallagher, T. R., Zurdo, J., and Stallwood, Y. (2015). Aggregation risk prediction for antibodies and its application to biotherapeutic development. *mAbs*, **7**(2), 352–363.
- O’Brien, R. M. (2007). A caution regarding rules of thumb for variance inflation factors. *Quality & quantity*, **41**(5), 673–690.
- Peterson, R. A. (2017). *bestNormalize: A suite of normalizing transformations*. R package version 3.4.1.
- Raybould, M. I. J., Marks, C., Krawczyk, K., Taddese, B., Nowak, J., Lewis, A. P., Bujotzek, A., Shi, J., and Deane, C. M. (2019). Five computational developability guidelines for therapeutic antibody profiling. *Proceedings of the National Academy of Sciences of the United States of America*, **116**(10), 4025–4030.
- Razinkov, V., J Treuheit, M., and W Becker, G. (2013). Methods of high throughput biophysical characterization in biopharmaceutical development. *Current drug discovery technologies*, **10**(1), 59–70.
- Robinson, J. R., Karkov, H. S., Woo, J. A., Krogh, B. O., and Cramer, S. M. (2017). Qsar models for prediction of chromatographic behavior of homologous fab variants. *Biotechnology and bioengineering*, **114**, 1231–1240.
- Sankar, K., Krystek Jr, S. R., Carl, S. M., Day, T., and Maier, J. K. (2018). Aggscore: Prediction of aggregation-prone regions in proteins based on the distribution of surface patches. *Proteins: Structure, Function, and Bioinformatics*, **86**(11), 1147–1156.
- Shan, L., Mody, N., Sormanni, P., Rosenthal, K., Damschroder, M., and Esfandiary, R. (2018). Developability assessment of engineered monoclonal antibody variants with a complex self-association behavior using complementary analytical and in silico tools. *Molecular pharmaceutics*, **15**(12), 5697–5710.
- Sharma, V. K., Patapoff, T. W., Kabakoff, B., Pai, S., Hilario, E., Zhang, B., Li, C., Borisov, O., Kelley, R. F., Chorny, I., et al. (2014). In silico selection of therapeutic antibodies for development: viscosity, clearance, and chemical stability. *Proceedings of the National Academy of Sciences*, **111**(52), 18601–18606.
- Sormanni, P., Amery, L., Ekizoglou, S., Vendruscolo, M., and Popovic, B. (2017). Rapid and accurate in silico solubility screening of a monoclonal antibody library. *Scientific Reports*, **7**(1), 8200.
- Tartaglia, G. G. and Vendruscolo, M. (2008). The Zyggregator method for predicting protein aggregation propensities. *Chemical Society Reviews*, **37**(7), 1395–1401.
- Trainor, K., Gingras, Z., Shillingford, C., Malakian, H., Gosselin, M., LipovÅaek, D., and Meiering, E. M. (2016). Ensemble modeling and intracellular aggregation of an engineered immunoglobulin-like domain. *Journal of molecular biology*, **428**, 1365–1374.

Uversky, V. N., Gillespie, J. R., and Fink, A. L. (2000). Why are "natively unfolded" proteins unstructured under physiologic conditions? *Proteins: Structure, Function, And Bioinformatics*, **41**(3), 415–427.

Venables, W. N. and Ripley, B. D. (2013). *Modern applied statistics with S-PLUS*. Springer Science & Business Media.

Walsh, I., Seno, F., Tosatto, S. C., and Trovato, A. (2014). Pasta 2.0: an improved server for protein aggregation prediction. *Nucleic acids research*, **42**(W1), W301–W307.

Zou, H. and Hastie, T. (2005). Regularization and variable selection via the elastic net. *Journal of the royal statistical society: series B (statistical methodology)*, **67**(2), 301–320.
